# Supplementary material
Source: ML conference proceedings conference paper supplement (https://openreview.net/forum?id=KD0M-BbuCYx)

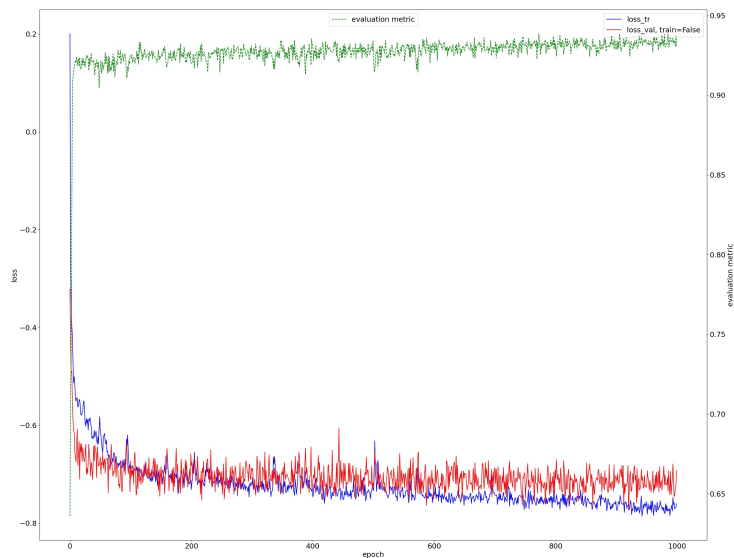

(a) nnUNet\_3d\_cascade\_fold\_1

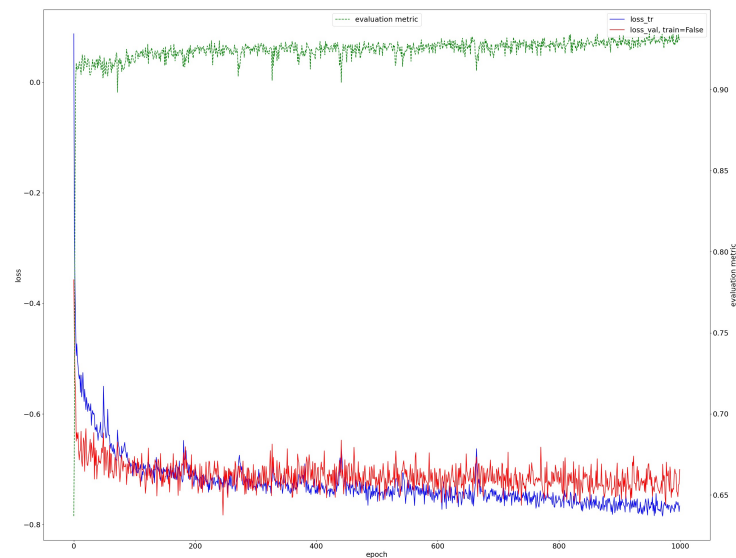

(b) nnUNet\_3d\_cascade\_fold\_2

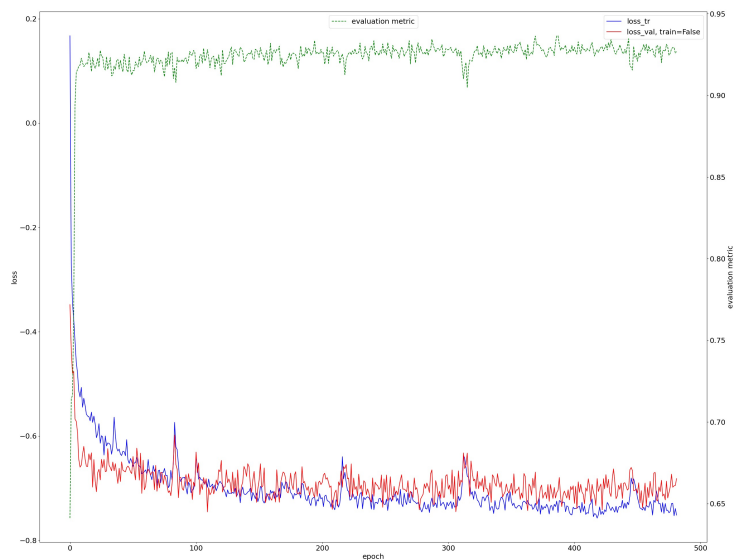

(c) nnUNet\_3d\_cascade\_fold\_3

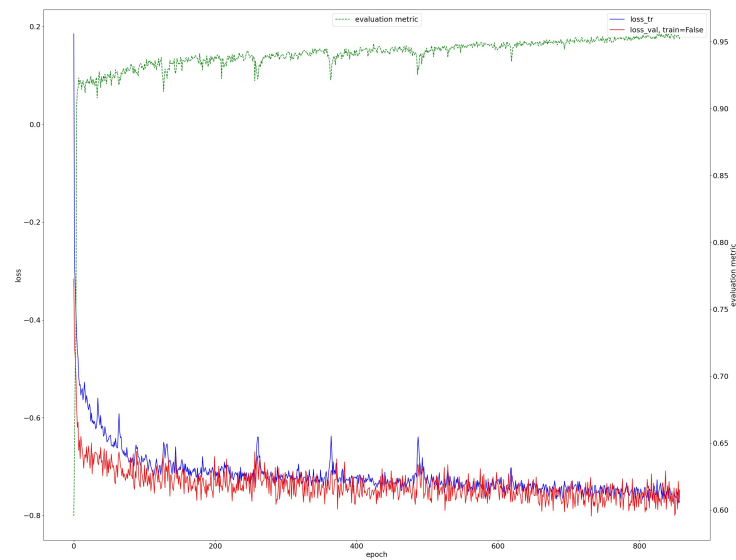

(d) nnUNet\_3d\_cascade\_fold\_4

Supplement: supplementary_material [file attachment]

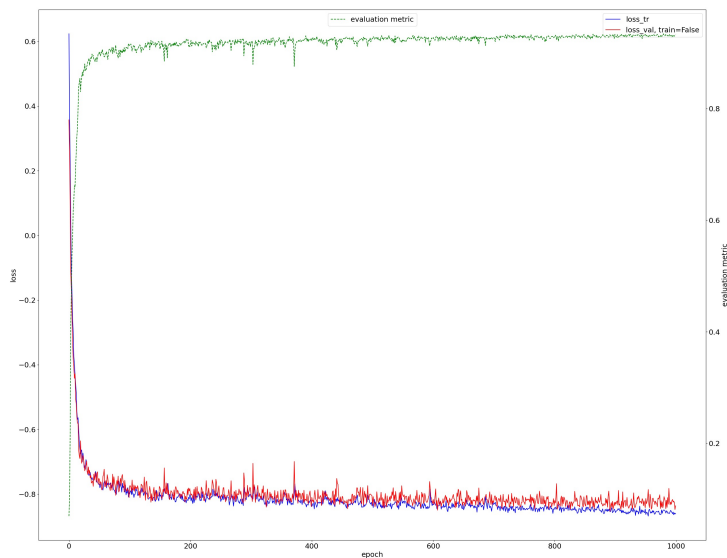

(a) nnUNet\_3d\_lowres\_fold\_2

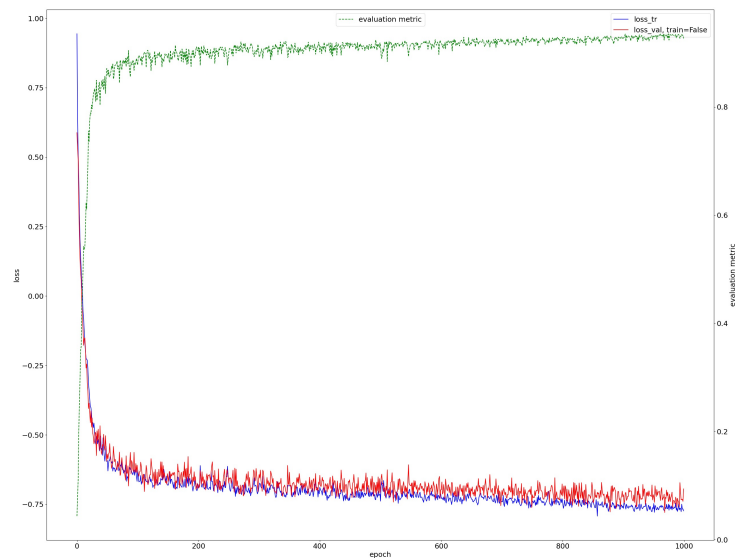

(b) nnUNet\_3d\_lowres\_fold\_3

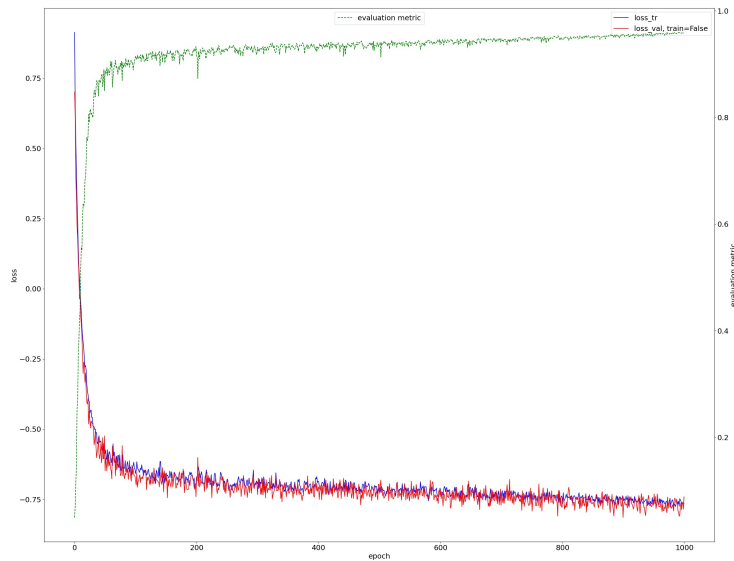

(c) nnUNet\_3d\_lowres\_fold\_4

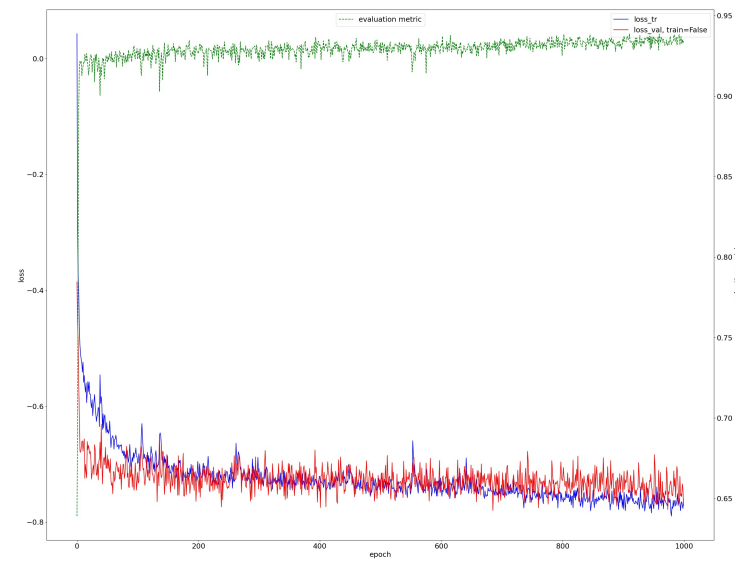

(d) nnUNet\_3d\_cascade\_fold\_0

Supplement: supplementary_material [file attachment]

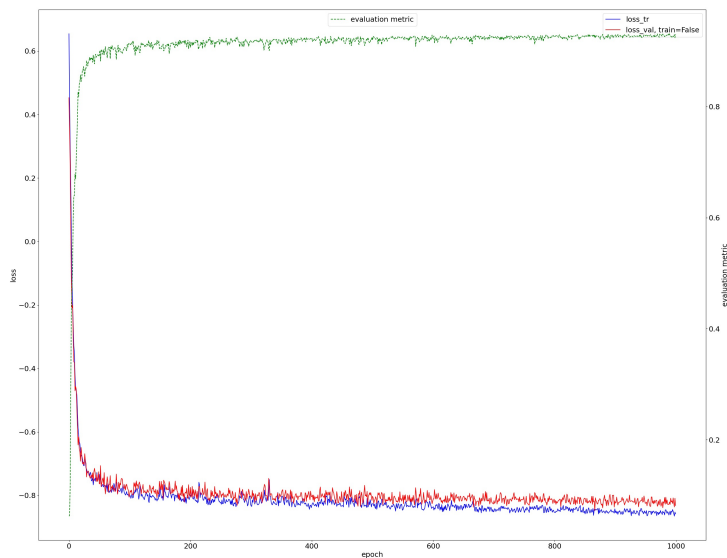

(a) nnUNet\_3d\_fullres\_fold\_0

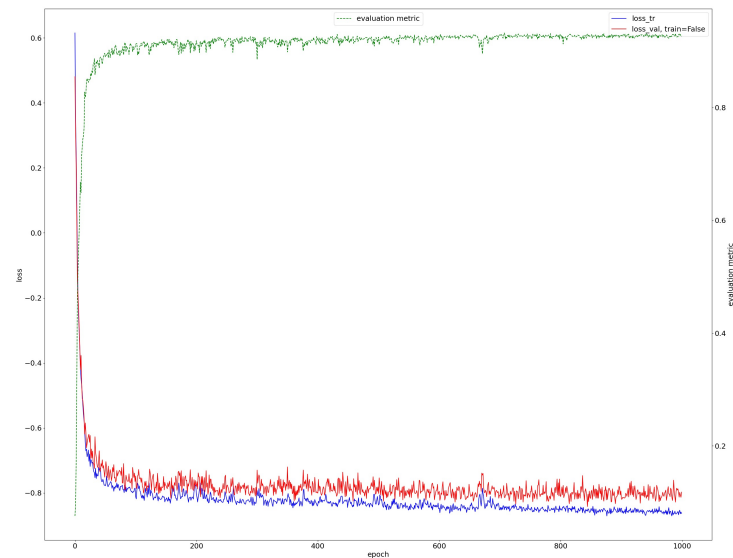

(b) nnUNet\_3d\_fullres\_fold\_1

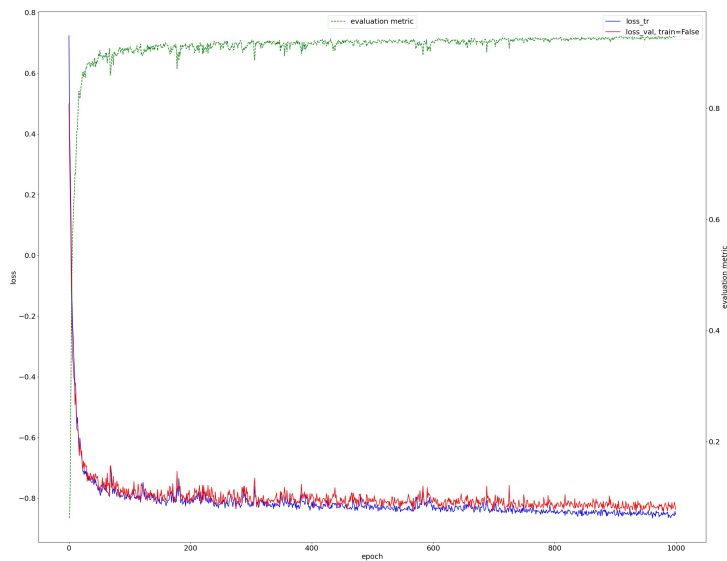

(c) nnUNet\_3d\_lowres\_fold\_0

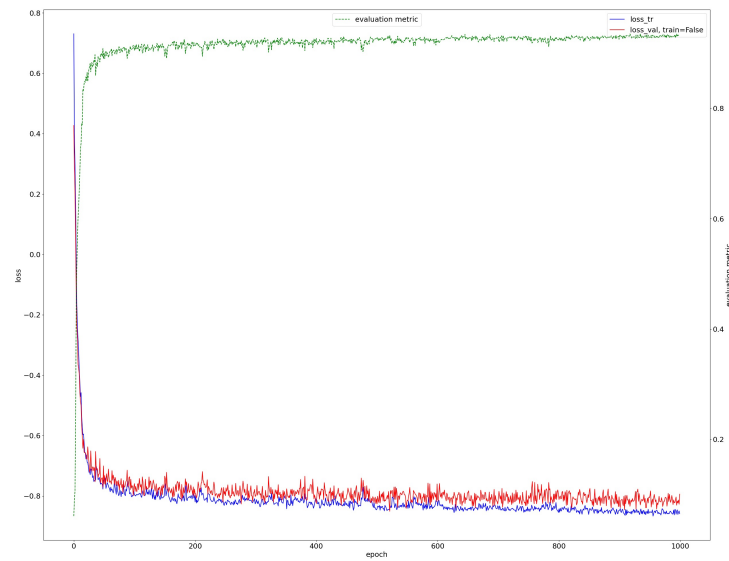

(d) nnUNet\_3d\_lowres\_fold\_1

Supplement: supplementary_material [file attachment]
